# Supplementary material for: Evaluation of Immunoregulatory Biomarkers on Plasma Small Extracellular Vesicles for Disease Progression and Early Therapeutic Response in Head and Neck Cancer
Source: MDPI journal article supplement (doi:10.3390/cells11050902), 2022-03-05
Supplement: s1 [file s1]

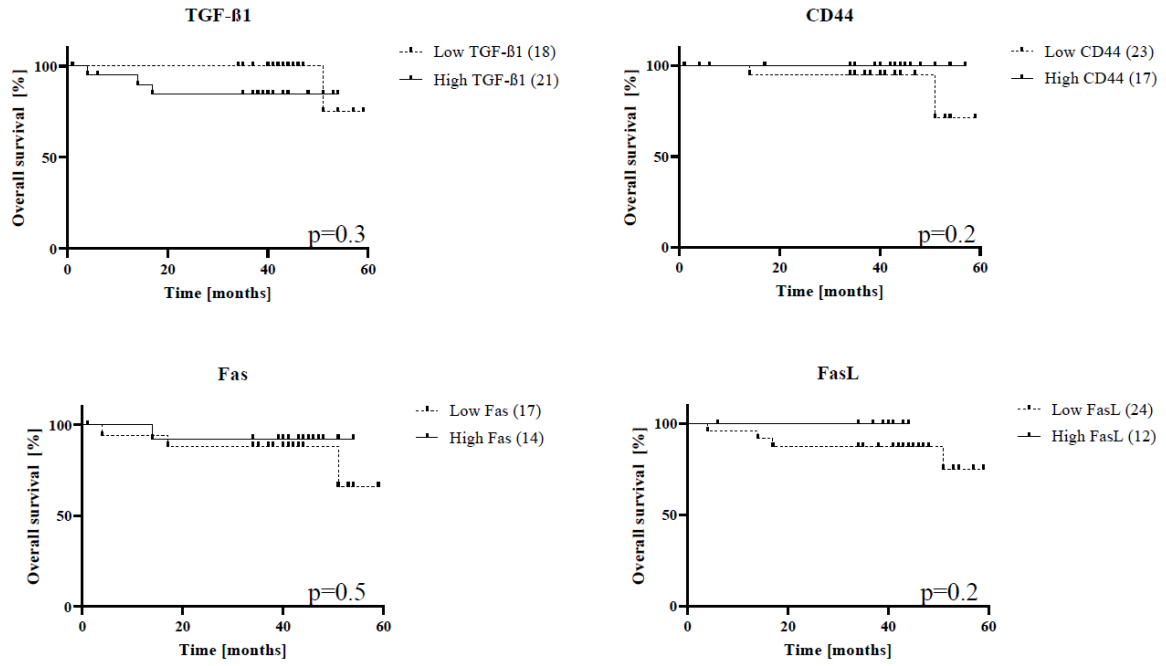

Supplementary Figure S1: Overall survival analysis of HNC patients for the immunoregulatory markers Fas, FasL, TGF-β1, and CD44.
